# Supplementary material
Source: PubMed Central journal article supplement (PMC5210162)
Supplement: EMBR-18-138-s001.pdf [file EMBR-18-138-s001.pdf]

## **Appendix**

### **Appendix Table S1**

**Appendix Table S1. Strains, plasmids and oligonucleotides used in this study.**

**Strains**

| <b>Strains</b>                       | <b>Description and genotype</b>                                                                                                                                    | <b>Source</b>                 |
|--------------------------------------|--------------------------------------------------------------------------------------------------------------------------------------------------------------------|-------------------------------|
| <i>E. coli</i> K-12                  |                                                                                                                                                                    |                               |
| DH5 $\alpha$                         | F-, $\Delta(\text{argF-lac})$ U169, <i>phoA</i> , <i>supE44</i> , $\Delta(\text{lacZ})$ M15, <i>relA</i> , <i>endA</i> , <i>thi</i> , <i>hsdR</i>                  | New England Biolabs           |
| W3110                                | F-, lambda- IN( <i>rrnD-rrnE</i> )1 <i>rph</i> -1                                                                                                                  | Laboratory collection         |
| BTH101                               | F-, <i>cya</i> -99, <i>araD139</i> , <i>galE15</i> , <i>galK16</i> , <i>rpsL1</i> ( <i>Str r</i> ), <i>hsdR2</i> , <i>mcrA1</i> , <i>mcrB1</i> .                   | Karimova <i>et al.</i> , 2005 |
| BL21(DE3)                            | F-, <i>fhuA2</i> , <i>lon</i> , <i>ompT</i> , <i>gal</i> ( $\lambda$ <i>int::(lacI::PlacUV5::T7 gene1)</i> ), <i>dcm</i> , $\Delta$ <i>hsdS</i>                    | New England Biolabs           |
| MC1061                               | F-, <i>araD139</i> $\Delta(\text{ara-leu})$ , <i>galE15</i> , <i>galK16</i> , $\Delta(\text{lac})$ X74, <i>rpsL</i> ( <i>Str<sup>R</sup></i> ) <i>hsdR2 mcrAB1</i> | New England Biolabs           |
| Enteroaggregative <i>E. coli</i>     |                                                                                                                                                                    |                               |
| 17-2                                 | WT enteroaggregative <i>Escherichia coli</i>                                                                                                                       | Arlette Darfeuille-Michaud    |
| 17-2 $\Delta$ <i>tssM</i>            | 17-2 deleted of the <i>tssM</i> gene of the <i>sci1</i> T6SS gene cluster                                                                                          | Aschtgen <i>et al.</i> , 2010 |
| 17-2 $\Delta$ <i>mltA</i>            | 17-2 deleted of the <i>mltA</i> gene                                                                                                                               | This study                    |
| 17-2 $\Delta$ <i>mltB</i>            | 17-2 deleted of the <i>mltB</i> gene                                                                                                                               | This study                    |
| 17-2 $\Delta$ <i>mltC</i>            | 17-2 deleted of the <i>mltC</i> gene                                                                                                                               | This study                    |
| 17-2 $\Delta$ <i>mltD</i>            | 17-2 deleted of the <i>mltD</i> gene                                                                                                                               | This study                    |
| 17-2 $\Delta$ <i>mltE</i>            | 17-2 deleted of the <i>mltE</i> gene                                                                                                                               | This study                    |
| 17-2 $\Delta$ <i>slt70</i>           | 17-2 deleted of the <i>slt70</i> gene                                                                                                                              | This study                    |
| 17-2 $\Delta$ 2762                   | 17-2 deleted of the <i>EC042_2762</i> gene                                                                                                                         | This study                    |
| 17-2 $\Delta$ <i>etgA</i>            | 17-2 deleted of the <i>etgA</i> gene                                                                                                                               | This study                    |
| 17-2 sfGFP-TssM                      | sfGFP inserted after the start codon of the <i>tssM</i> gene in 17-2                                                                                               | Durand <i>et al.</i> , 2015   |
| 17-2 $\Delta$ <i>mltE</i> sfGFP-TssM | 17-2 sfGFP-TssM deleted of the <i>mltE</i> gene                                                                                                                    | This study                    |

## Plasmids

| Vectors                                   | Description                                                                                                                                         | Source                                    |
|-------------------------------------------|-----------------------------------------------------------------------------------------------------------------------------------------------------|-------------------------------------------|
| <b>Vectors for chromosomal insertions</b> |                                                                                                                                                     |                                           |
| pKD4                                      | One-step gene inactivation vector, Kan <sup>R</sup>                                                                                                 | Datsenko & Wanner, 2000                   |
| pKOBEG                                    | Recombination vector, phage $\lambda$ <i>rec<math>\gamma</math></i> $\beta$ <i>a</i> operon under the control of the pBAD promoter, Cm <sup>R</sup> | Chaverroche <i>et al.</i> , 2000          |
| <b>Expression vectors</b>                 |                                                                                                                                                     |                                           |
| pUA66- <i>rrnB</i>                        | <i>P<sub>rrnB</sub></i> :: <i>gfpmut2</i> transcriptional fusion in pUA66, Kan <sup>R</sup>                                                         | Zaslaver <i>et al.</i> , 2006             |
| pASK-IBA37(+)                             | cloning vector, <i>P<sub>tet</sub></i> , fl origin, Amp <sup>R</sup>                                                                                | IBA Technology                            |
| pASK-IBA37- <sub>FLAG</sub> TssM          | <i>sci-1 tssM</i> carrying N-terminal FLAG tag cloned into pASK-IBA37(+)                                                                            | Aschtgen <i>et al.</i> , 2010             |
| pASK-IBA4                                 | cloning vector, <i>P<sub>tet</sub></i> , <i>OmpA</i> signal sequence, fl origin, Amp <sup>R</sup>                                                   | IBA Technology                            |
| pASK-IBA4-TssMp                           | <i>sci-1 tssM</i> periplasmic domain (aa 386-1129), cloned into pASK-IBA4, N-terminal FLAG epitope                                                  | Felisberto-Rodrigues <i>et al.</i> , 2011 |
| pASK-IBA4-TssM <sub>386-973</sub>         | <i>sci-1 tssM</i> periplasmic fragment (aa 386-973), cloned into pASK-IBA4, N-terminal FLAG epitope                                                 | Felisberto-Rodrigues <i>et al.</i> , 2011 |
| pASK-IBA4-TssM <sub>972-1129</sub>        | <i>sci-1 tssM</i> periplasmic fragment (aa 972-1129), cloned into pASK-IBA4, N-terminal FLAG epitope                                                | Felisberto-Rodrigues <i>et al.</i> , 2011 |
| pMS600                                    | cloning vector, pOK12 derivative, <i>Plac</i> , P15A origin, Kan <sup>R</sup>                                                                       | Aschtgen <i>et al.</i> , 2008             |
| pMS-Hcp <sub>HA</sub>                     | <i>sci-1 hep</i> gene cloned into pMS600, C-terminal HA epitope                                                                                     | Aschtgen <i>et al.</i> , 2010             |
| pMS-TssJ <sub>HA</sub>                    | <i>sci-1 tssJ</i> gene cloned into pMS600, C-terminal HA epitope                                                                                    | Aschtgen <i>et al.</i> , 2008             |
| pMS-TssL <sub>HA</sub>                    | <i>sci-1 tssL</i> gene cloned into pMS600, C-terminal HA epitope                                                                                    | Aschtgen <i>et al.</i> , 2012             |
| pUC12                                     | cloning vector, <i>Plac</i> , ColE1 origin, Amp <sup>R</sup>                                                                                        | Norrande <i>et al.</i> , 1983             |
| pUC-Hcp <sub>FLAG</sub>                   | <i>sci-1 hep</i> gene cloned into pUC12, C-terminal FLAG epitope                                                                                    | Aschtgen <i>et al.</i> , 2008             |
| pBAD33                                    | cloning vector, <i>Para</i> , <i>araC</i> , p15A origin, Cm <sup>R</sup>                                                                            | Guzman <i>et al.</i> , 1995               |
| pBAD33-MltE <sub>VSV-G</sub>              | <i>mltE</i> gene cloned into pBAD33, C-terminal VSV-G epitope                                                                                       | This study                                |
| pBAD33-MltE <sup>E64Q</sup>               | <i>mltE</i> Glu64-to-Gln mutation introduced in pBAD33-MltE <sub>VSV-G</sub> , C-terminal VSV-G epitope                                             | This study                                |
| pETG20A                                   | Gateway® destination cloning vector, <i>PT7</i> , N-terminal 6×His tag, TEV cleavage sequence, ColE1 origin, Amp <sup>R</sup>                       | Arie Gerlof                               |
| pETG20A-TssMp                             | <i>sci-1 tssM</i> periplasmic domain (aa 386-1129), cloned into pETG20A                                                                             | Felisberto-Rodrigues <i>et al.</i> , 2011 |
| pBADnLIC                                  | cloning vector, <i>Para</i> , <i>araC</i> , N-terminal 10×His tag, TEV cleavage sequence, P15A origin, Amp <sup>R</sup>                             | Geertsma & Poolman, 2007                  |
| pBADnLIC-sMltE                            | <i>mltE</i> gene lacking its signal sequence cloned into pBADnLIC                                                                                   | Fibriansah <i>et al.</i> , 2012           |
| pBADnLIC-MltE <sup>E64Q</sup>             | <i>mltE</i> Glu64-to-Gln mutation introduced in pBADnLIC-MltE                                                                                       | Fibriansah <i>et al.</i> , 2012           |
| <b>Bacterial two-hybrid vectors</b>       |                                                                                                                                                     |                                           |
| pT18-FLAG                                 | bacterial two hybrid vector, ColE1 origin, <i>Plac</i> , T18 fragment of <i>Bordetella pertussis</i> CyaA, Amp <sup>R</sup>                         | Battesti & Bouveret, 2008                 |

|                           |                                                                                                                            |                            |
|---------------------------|----------------------------------------------------------------------------------------------------------------------------|----------------------------|
| pT18-MltA                 | <i>mltA</i> gene lacking its signal sequence cloned downstream T18 in pT18-FLAG                                            | This study                 |
| pT18-MltB                 | <i>mltB</i> gene lacking its signal sequence cloned downstream T18 in pT18-FLAG                                            | This study                 |
| pT18-MltC                 | <i>mltC</i> gene lacking its signal sequence cloned downstream T18 in pT18-FLAG                                            | This study                 |
| pT18-MltD                 | <i>mltD</i> gene lacking its signal sequence cloned downstream T18 in pT18-FLAG                                            | This study                 |
| pT18-MltE                 | <i>mltE</i> gene lacking its signal sequence cloned downstream T18 in pT18-FLAG                                            | This study                 |
| pT18-MltE <sup>E64Q</sup> | <i>mltE</i> Glu64-to-Gln mutation introduced in pT18-MltE                                                                  | This study                 |
| pT18-Slt70                | <i>slt70</i> gene lacking its signal sequence cloned downstream T18 in pT18-FLAG                                           | This study                 |
| pT18-2762                 | <i>EC042_2762</i> gene lacking its signal sequence cloned downstream T18 in pT18-FLAG                                      | This study                 |
| pT18-EtgA                 | <i>etgA</i> gene lacking its signal sequence cloned downstream T18 in pT18-FLAG                                            | This study                 |
| pT18-Pal                  | <i>pal</i> gene lacking its signal sequence cloned downstream T18 in pT18-FLAG                                             | Battesti & Bouveret, 2008  |
| pT25-FLAG                 | bacterial two hybrid vector, P15A origin, <i>Plac</i> , T25 fragment of <i>Bordetella pertussis</i> CyaA, Kan <sup>R</sup> | Battesti & Bouveret, 2008  |
| pT25-VgrG                 | <i>sci-1 vgrG</i> gene cloned downstream T25 in pT25-FLAG                                                                  | Zoued <i>et al.</i> , 2013 |
| pT25-TssJ <sub>sol</sub>  | <i>sci-1 tssJ</i> gene lacking its signal sequence cloned downstream T25 in pT25-FLAG                                      | Zoued <i>et al.</i> , 2013 |
| pT25-TssMp                | <i>sci-1 tssM</i> periplasmic domain (amino-acids 386-1129) cloned downstream T25 in pT25-FLAG                             | Zoued <i>et al.</i> , 2013 |
| pT25-TagLp                | <i>sci-1 tagL</i> periplasmic domain (amino-acids 352-576) cloned downstream T25 in pT25-FLAG                              | This study                 |
| pTolB-T25                 | <i>tolB</i> gene cloned upstream T25 in pT25-FLAG                                                                          | Battesti & Bouveret, 2008  |

## Oligonucleotides

| Name                                                    | Destination                | Sequence (5' to 3')                                                       |
|---------------------------------------------------------|----------------------------|---------------------------------------------------------------------------|
| For chromosomal mutant strain construction <sup>a</sup> |                            |                                                                           |
| 5-Del-mltA-DW                                           | <i>mltA</i> gene deletion  | CGGTTTGTTATCTTCGTTGCGCCTTATTTTTTAACTGAAGAAGAGAACATGTGTAGGCTGGAGCTGCTTCG   |
| 3-Del-mltA-DW                                           | <i>mltA</i> gene deletion  | TTACCCCTCACCCTGTCATATCCGTAAAAACGGCATAACAGAATATCACACATATGAATATCCTCCTTAGTTC |
| 5-Del-mltB-DW                                           | <i>mltB</i> gene deletion  | TGATGCTTTACCATACTTGCCCTGGTTGAATCTGTTAAATGGACCCCTCTGTGTAGGCTGGAGCTGCTTCG   |
| 3-Del-mltB-DW                                           | <i>mltB</i> gene deletion  | AAAAGCTGATTAGCCAGAGGGAAGCTCACGCTCCCTCTTGCAAAATAGCATATGAATATCCTCCTTAGTTC   |
| 5-Del-mltC-DW                                           | <i>mltC</i> gene deletion  | GCACGCCTCCGGCAACTTGCATAAAAAACAAACACAACACGCACCCGGATGTGTAGGCTGGAGCTGCTTCG   |
| 3-Del-mltC-DW                                           | <i>mltC</i> gene deletion  | TGTGGATAACATTTTTGCCCTGAGCATCGTCAGGGGCGGTTAATGGAACATATGAATATCCTCCTTAGTTC   |
| 5-Del-mltD-DW                                           | <i>mltD</i> gene deletion  | TCCGTTGCGCGTTATGATCGGTCGCTTTTTAAGCAACTATTGACACACACTGTGTAGGCTGGAGCTGCTTCG  |
| 3-Del-mltD-DW                                           | <i>mltD</i> gene deletion  | AAATAAAAAAGGCACCGGGGGAATCGGTGCCTTTTTATTATCTGGTTTGCATATGAATATCCTCCTTAGTTC  |
| 5-Del-mltE-DW                                           | <i>mltE</i> gene deletion  | TGTGCCGTTGTACCTCAACGGCGATTCCAGGCTATAAGGATAGAAGAAATGTGTAGGCTGGAGCTGCTTCG   |
| 3-Del-mltE-DW                                           | <i>mltE</i> gene deletion  | CTCTCGAGCGGGAAGCCCGGGAGAAAGCGGACAAAGTGCGCGACTGATCATATGAATATCCTCCTTAGTTC   |
| 5-Del-slt70-DW                                          | <i>slt70</i> gene deletion | TTACGCGGCATGACGCTGCATTGATGATTTTACACTTAGAGGATGCGCTTTGTGTAGGCTGGAGCTGCTTCG  |

|                |                                 |                                                                                   |
|----------------|---------------------------------|-----------------------------------------------------------------------------------|
| 3-Del-slt70-DW | <i>slt70</i> gene deletion      | <u>CCGGTTGTA</u> CTCGCTAAAGAGTACGATAGCATATCATAAACGTGCGGACATATGAATATCCTCCTTAGTTC   |
| 5-Del-2762-DW  | <i>EC042_2762</i> gene deletion | <u>TTATTACGTTTTTTCAAGCTGGGACGCGCACGACACAGAGAATTA</u> ACTAATGTGTAGGCTGGAGCTGCTTCG  |
| 3-Del-2762-DW  | <i>EC042_2762</i> gene deletion | <u>ATGCGCCGCCAGGAAATTA</u> AGCGCAGAAAAAGCGCGATCCTCGACGGACATATGAATATCCTCCTTAGTTC   |
| 5-Del-etgA-DW  | <i>etgA</i> gene deletion       | <u>GATTATATTAGTATCTCGTT</u> CCTTTCCTTCAATCCTACACATAAAAAATATTGTGTAGGCTGGAGCTGCTTCG |
| 3-Del-etgA-DW  | <i>etgA</i> gene deletion       | <u>AGCTTACGTATGGGTGTTT</u> GCACTATATAAAAAAAGAGGCTTTAGGCCATATGAATATCCTCCTTAGTTC    |

For plasmid construction <sup>b,c</sup>

|                               |                                                               |                                                                                                      |
|-------------------------------|---------------------------------------------------------------|------------------------------------------------------------------------------------------------------|
| 5-pBAD-MltE <sub>VSV-G</sub>  | insertion of <i>mltE</i> into pBAD33                          | <u>CTCTCTACTGTTTCTCCATACCCGTTTTTTTTGGGCTAGCAGGAGGTATTACACCATGAAATT</u><br>AAGATGGTTTTGCCTTTTTGATTGTG |
| 3- pBAD-MltE <sub>VSV-G</sub> | insertion of <i>mltE</i> into pBAD33                          | <u>GGTCGACTCTAGAGGATCCCCGGGTACCTTATTTTCTAATCTATTCATTTCAATATCTGTATAC</u><br>ATCGCGTCCAGTGCCTGC        |
| T18N-5-MltA                   | insertion of signal sequence-less <i>mltA</i> into pT18-FLAG  | <u>CGCCACTGCAGGGATTATAAAAGATGACGATGACAAGTCTTCCAAACCAAC</u><br>CGATCGCG                               |
| T25T18N-3-MltA                | insertion of signal sequence-less <i>mltA</i> into pT18-FLAG  | <u>CGAGGTCGACGGTATCGATAAGCTTGATATCGAATTCTAGTTAGCCGCTA</u><br>AAGACGTTACCTGCG                         |
| T18N-5-MltB                   | insertion of signal sequence-less <i>mltB</i> into pT18-FLAG  | <u>CGCCACTGCAGGGATTATAAAAGATGACGATGACAAGAGCAGCAAGCCAA</u><br>AACCTACTGAG                             |
| T25T18N-3-MltB                | insertion of signal sequence-less <i>mltB</i> into pT18-FLAG  | <u>CGAGGTCGACGGTATCGATAAGCTTGATATCGAATTCTAGTTACTGCACG</u><br>CGCGCCAG                                |
| T18N-5-MltC                   | insertion of signal sequence-less <i>mltC</i> into pT18-FLAG  | <u>CGCCACTGCAGGGATTATAAAAGATGACGATGACAAGTCGACGACCAAAA</u><br>AAGGCGATACC                             |
| T25T18N-3-MltC                | insertion of signal sequence-less <i>mltC</i> into pT18-FLAG  | <u>CGAGGTCGACGGTATCGATAAGCTTGATATCGAATTCTAGTTATCGGCGG</u><br>CGGTAGGATTTTTG                          |
| T18N-5-MltD                   | insertion of signal sequence-less <i>mltD</i> into pT18-FLAG  | <u>CGCCACTGCAGGGATTATAAAAGATGACGATGACAAGCAGAGTACCGGCA</u><br>ACGTTCAAC                               |
| T25T18N-3-MltD                | insertion of signal sequence-less <i>mltD</i> into pT18-FLAG  | <u>CGAGGTCGACGGTATCGATAAGCTTGATATCGAATTCTAGTTAGGAATCT</u><br>GGCATGTTGTTGTTTTTACAAAC                 |
| T18N-5-MltE                   | insertion of signal sequence-less <i>mltE</i> into pT18-FLAG  | <u>CGCCACTGCAGGGATTATAAAAGATGACGATGACAAGTCATCAAAGCATGA</u><br>CTACACGAACCC                           |
| T25T18N-3-MltE                | insertion of signal sequence-less <i>mltE</i> into pT18-FLAG  | <u>CGAGGTCGACGGTATCGATAAGCTTGATATCGAATTCTAGTTACATCGCGT</u><br>CCAGTGCCTG                             |
| T18N-5-Slt70                  | insertion of signal sequence-less <i>slt70</i> into pT18-FLAG | <u>CGCCACTGCAGGGATTATAAAAGATGACGATGACAAGGCGCGAGCCGACT</u><br>CACTG                                   |
| T25T18N-3-Slt70               | insertion of signal sequence-less <i>slt70</i> into pT18-FLAG | <u>CGAGGTCGACGGTATCGATAAGCTTGATATCGAATTCTAGTTAGTAACGA</u><br>CGTCCCCATCCGTG                          |

|                 |                                                                     |                                                                                      |
|-----------------|---------------------------------------------------------------------|--------------------------------------------------------------------------------------|
| T18N-5-2762     | insertion of signal sequence-less <i>EC042_2762</i> into pT18-FLAG  | <u>CGCCACTGCAGGGATTATAAAGATGACGATGACAAGGCTCTCTGG</u><br>CCATCCATTCC                  |
| T25T18N-3-2762  | insertion of signal sequence-less <i>EC042_2762</i> into pT18-FLAG  | <u>CGAGGTCGACGGTATCGATAAGCTTGATATCGAATTCTAGTTAAT</u><br>TTTGTTTCTCTTCACTCCCTTTCCTGG  |
| T18N-5-EtgA     | insertion of signal sequence-less <i>etgA</i> into pT18-FLAG        | <u>CGCCACTGCAGGGATTATAAAGATGACGATGACAAGGCCAGTAGCGCTTG</u><br>CTTTAATGAAGC            |
| T25T18N-3-EtgA  | insertion of signal sequence-less <i>etgA</i> into pT18-FLAG        | <u>CGAGGTCGACGGTATCGATAAGCTTGATATCGAATTCTAGTTATTTTGCTA</u><br>AAGCCTTACGCTTGCTATTTTC |
| T25N-5-TagLp    | insertion of <i>tagL</i> <sub>352-576</sub> fragment into pT25-FLAG | <u>GGCGGGCTGCAGATTATAAAGATGACGATGACAAGCGGCTGGTTTCGCAGC</u><br>GTG                    |
| T25T18N-3-TagLp | insertion of <i>tagL</i> <sub>352-576</sub> fragment into pT25-FLAG | <u>CGAGGTCGACGGTATCGATAAGCTTGATATCGAATTCTAGTTACTCCGTT</u><br>ATGTTTTCTGATGCGCC       |

**For site-directed mutagenesis<sup>d</sup>**

|             |                                      |                                            |
|-------------|--------------------------------------|--------------------------------------------|
| A-MltE-E64Q | Glu64-to-Gln mutation in <i>mltE</i> | GGCGATTATCGCTATCCA <b>AT</b> CGGGTGGTAATCC |
| B-MltE-E64Q | Glu64-to-Gln mutation in <i>mltE</i> | GGATTACCACCCG <b>ATTG</b> GATAGCGATAATCGCC |

<sup>a</sup> Sequences corresponding to the downstream and upstream regions of the gene to be deleted underlined

<sup>b</sup> Sequence annealing on the target plasmid underlined.

<sup>c</sup> FLAG or VSV-G epitope coding sequence *italicized*.

<sup>d</sup> Mutagenesized codon in **Bold**.
